# Supplementary material
Source: PubMed Central journal article supplement (PMC9509440)
Supplement: NIHMS1820649-supplement-supinfo.pdf [file NIHMS1820649-supplement-supinfo.pdf]

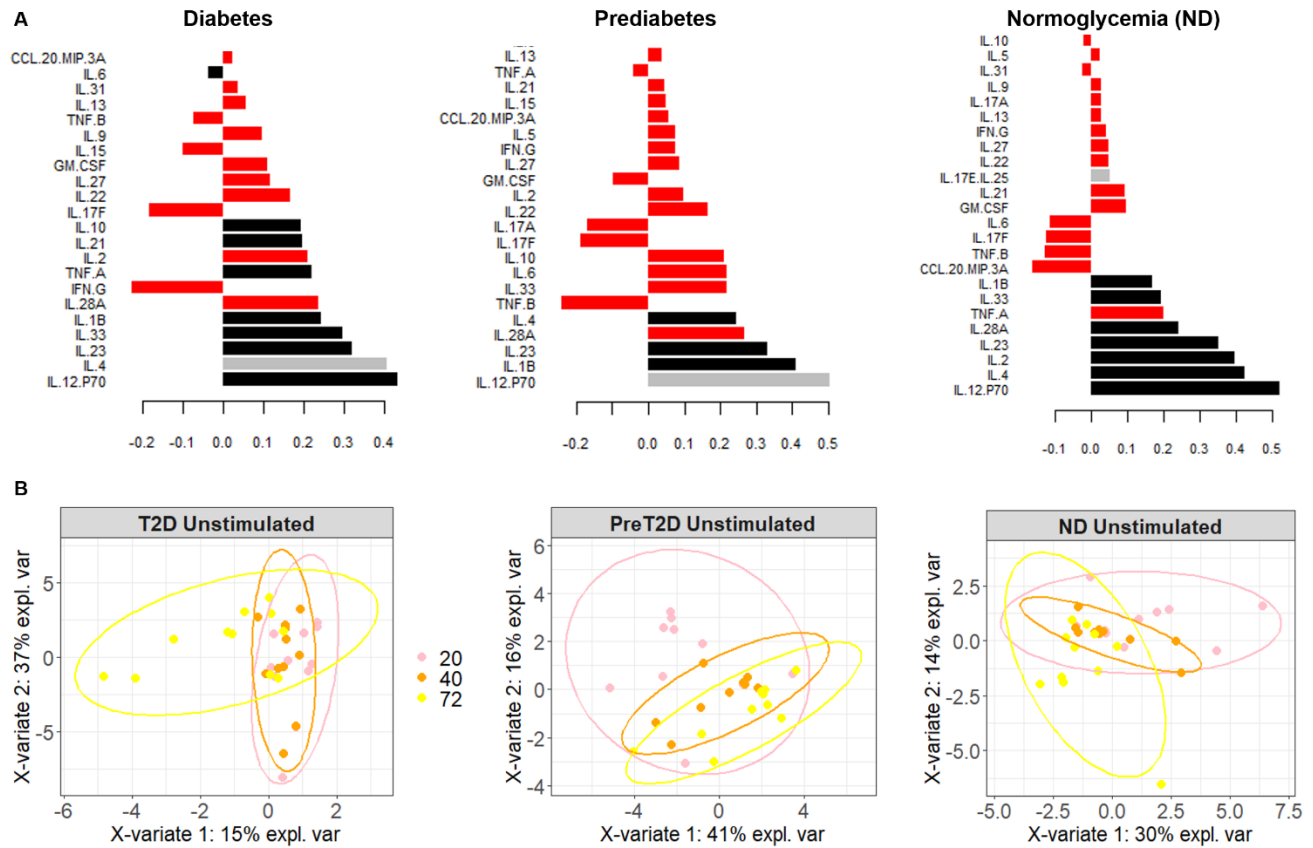

**Fig. S1:** Cytokines produced by CD3/CD28- but not LPS- nor unstimulated PBMCs from cohorts indicated change over time as shown by PLSDA. **(A)** The second component that defines inflammation has more contribution from cytokines elicited by 40h CD3/CD28 stimulation (black bars), especially for samples from diabetes and non-diabetes (ND) subjects, than the first component (See Fig. 1). **(B)** Cytokine profiles produced by unstimulated PBMCs from the indicated cohort insignificantly change over time. N's are shown in Table S1.

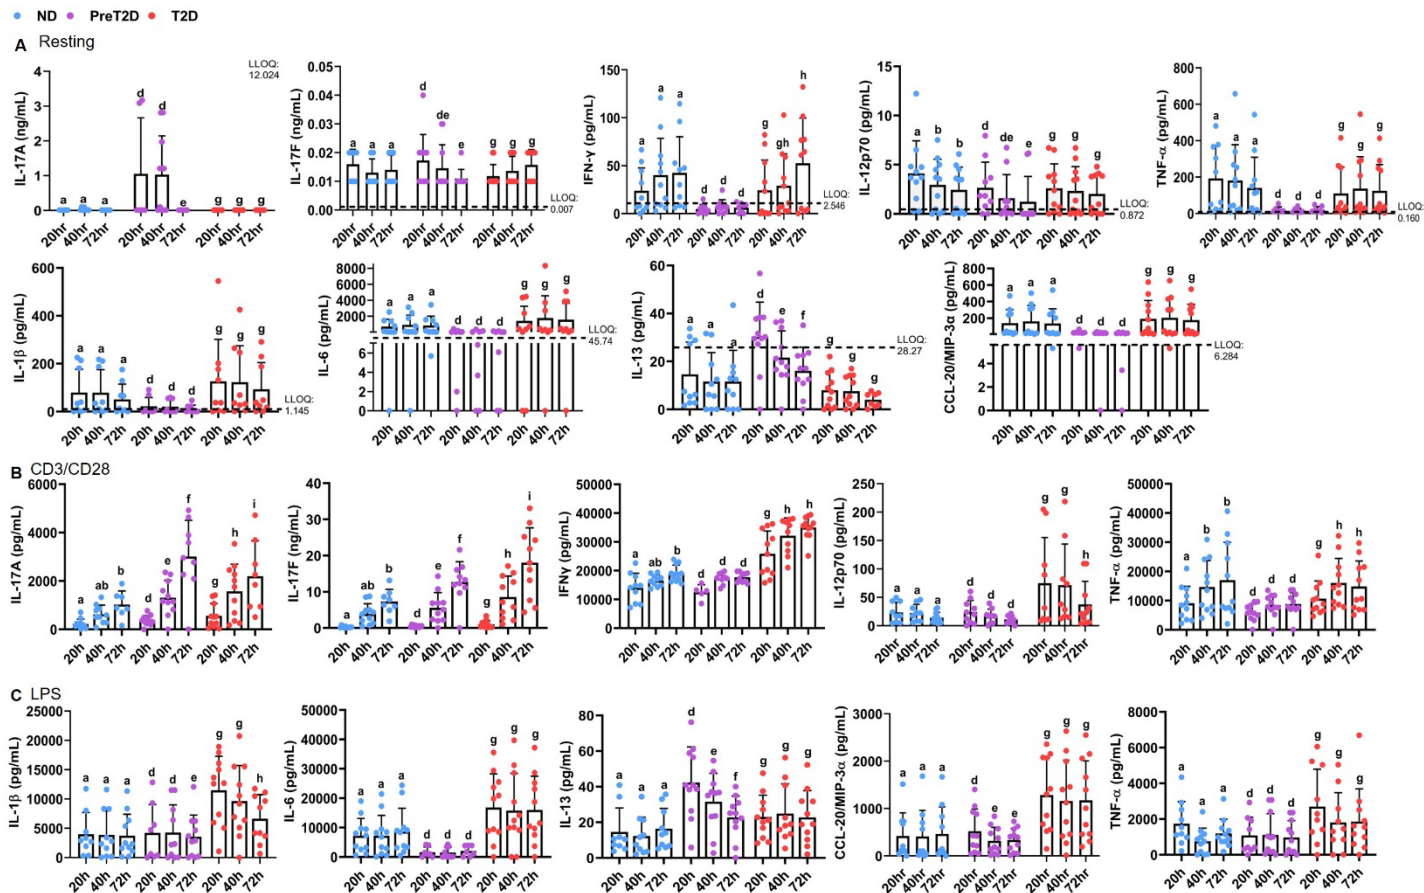

**Fig. S2:** Cytokines produced by CD3/CD28- but not LPS- nor unstimulated PBMCs from cohorts indicated change over time. **(A)** Representative cytokines produced by PBMCs from each cohort without the presence of stimulation (resting). **(B)** Representative cytokines produced by PBMCs from each cohort stimulated with CD3/CD28 for 20-72h. **(C)** Representative cytokines produced by LPS stimulation (20-72hr) from each cohort. N's are shown in Table S1. Dashed lines represent the lower limit of quantification (LLOQ) to identify samples above or below this cut-off. Differences determined by a mixed-effects analysis and Tukey's multiple comparisons. Significance defined as  $P < 0.05$  and represented as letters for each cohort (a-c for ND, d-f for PreT2D, and g-i for T2D). Bars assigned the same letter indicate no statistical difference amongst time points within the same cohort.

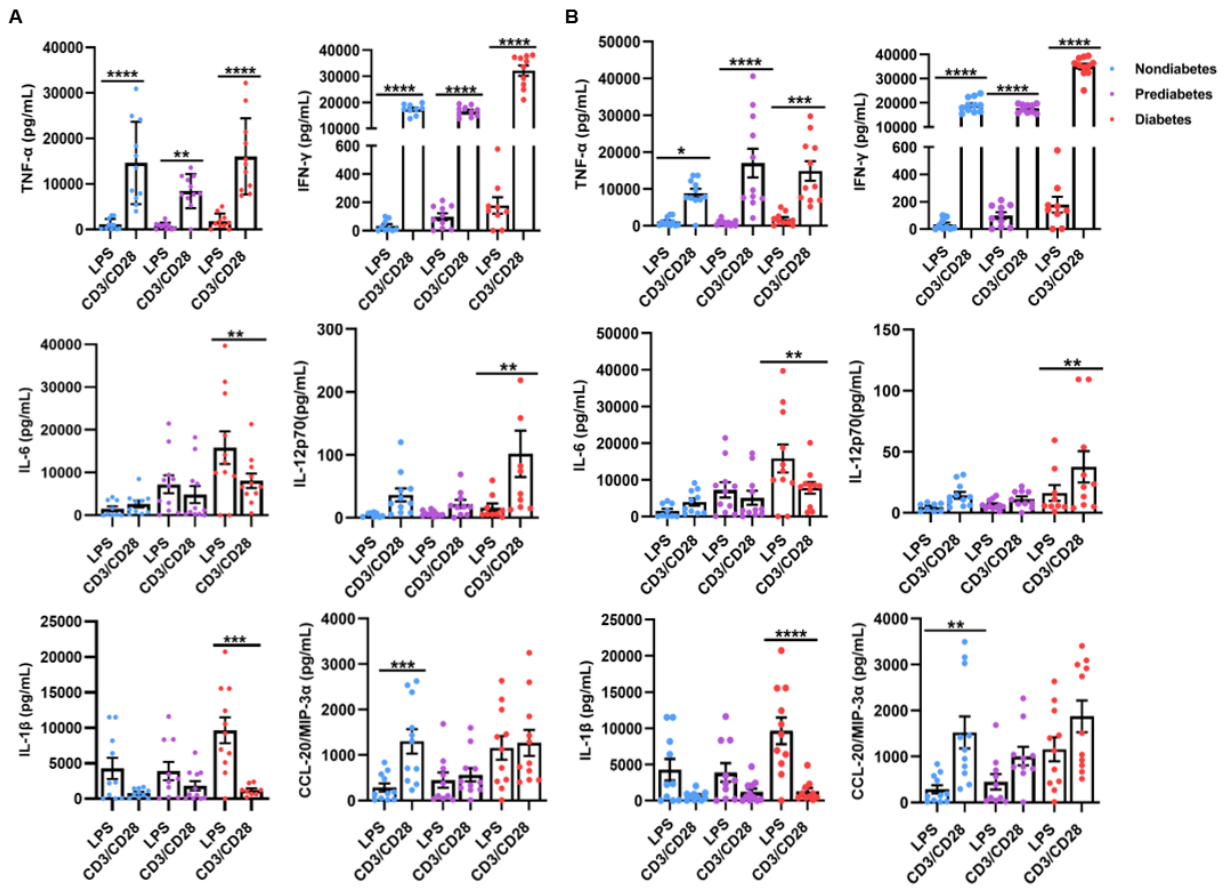

**Fig. S3: T cell and myeloid cell stimulation elicits approximately equivalent TNF $\alpha$  production by PBMCs from all overweight/obese subjects.** Direct comparison of cytokines elicited from PBMCs by 20 hr. LPS and (A) 40 hr CD3/CD28 or (B) 72 hrs CD/CD28 as measured in supernatants. PBMCs were from ND (blue), prediabetes (purple) or diabetes (red) subjects as indicated. Differences identified by 2-Way ANOVA are indicated. Bars show average and SD with Ns shown in Table S1.

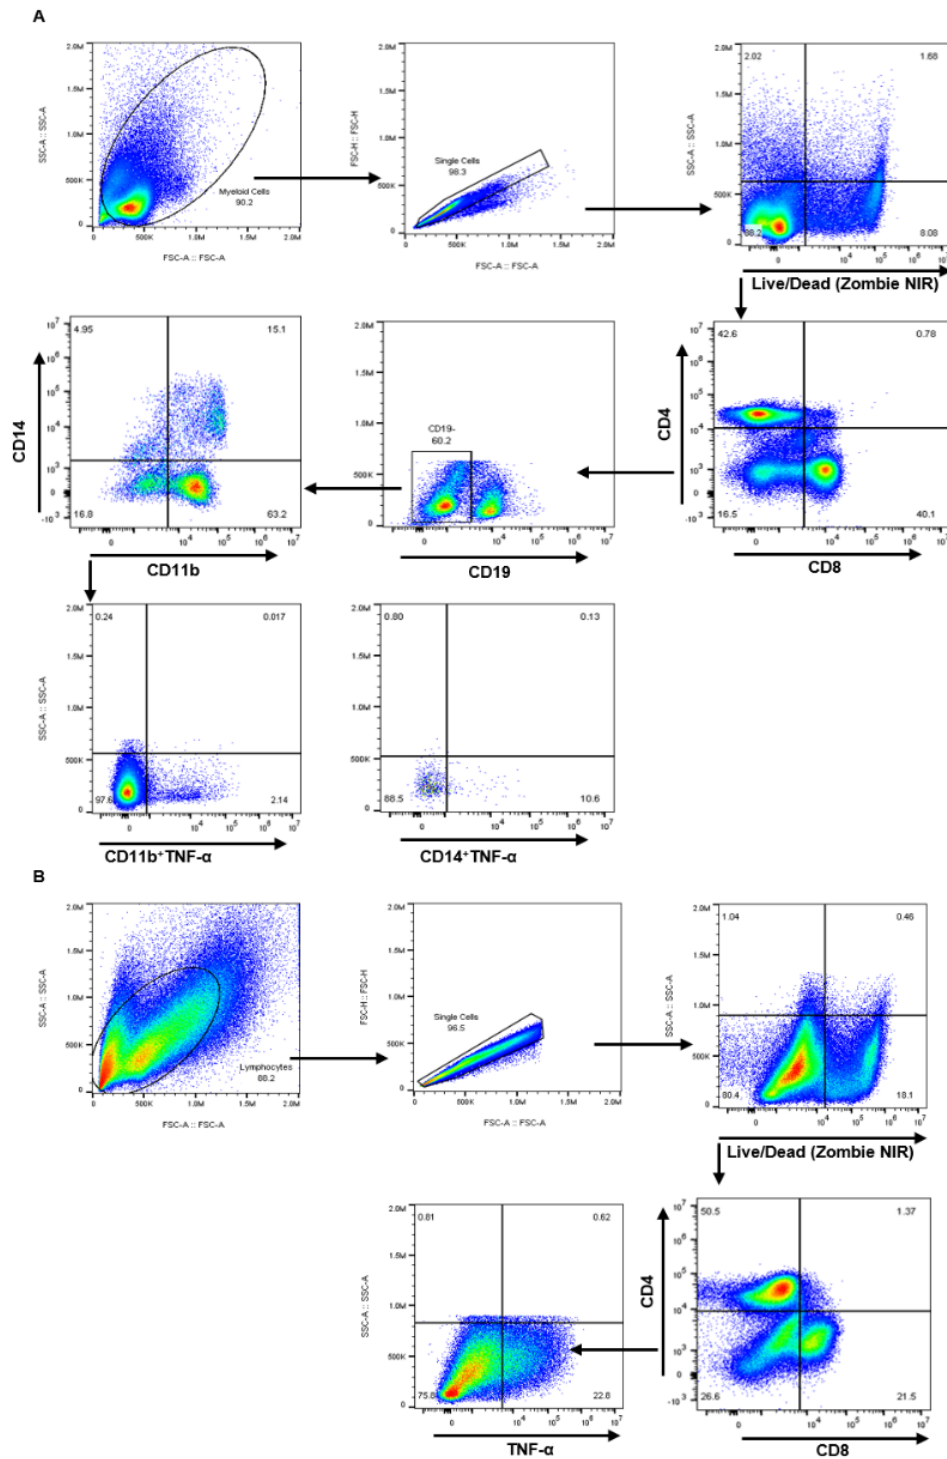

**Fig. S4. Gating Strategy for Intracellular TNF- $\alpha$  Staining of Myeloid Cell and CD4<sup>+</sup> T cells. (A)** Gating for CD11b<sup>+</sup> and CD14<sup>+</sup> cells from LPS-stimulated PBMCs (20hrs) and intracellular TNF- $\alpha$  within these myeloid populations. **(B)** Gating for CD4<sup>+</sup> T lymphocytes from  $\alpha$ -CD3/ $\alpha$ -CD28-stimulated PBMCs (40hrs) and intracellular TNF- $\alpha$  within the CD4<sup>+</sup> population.

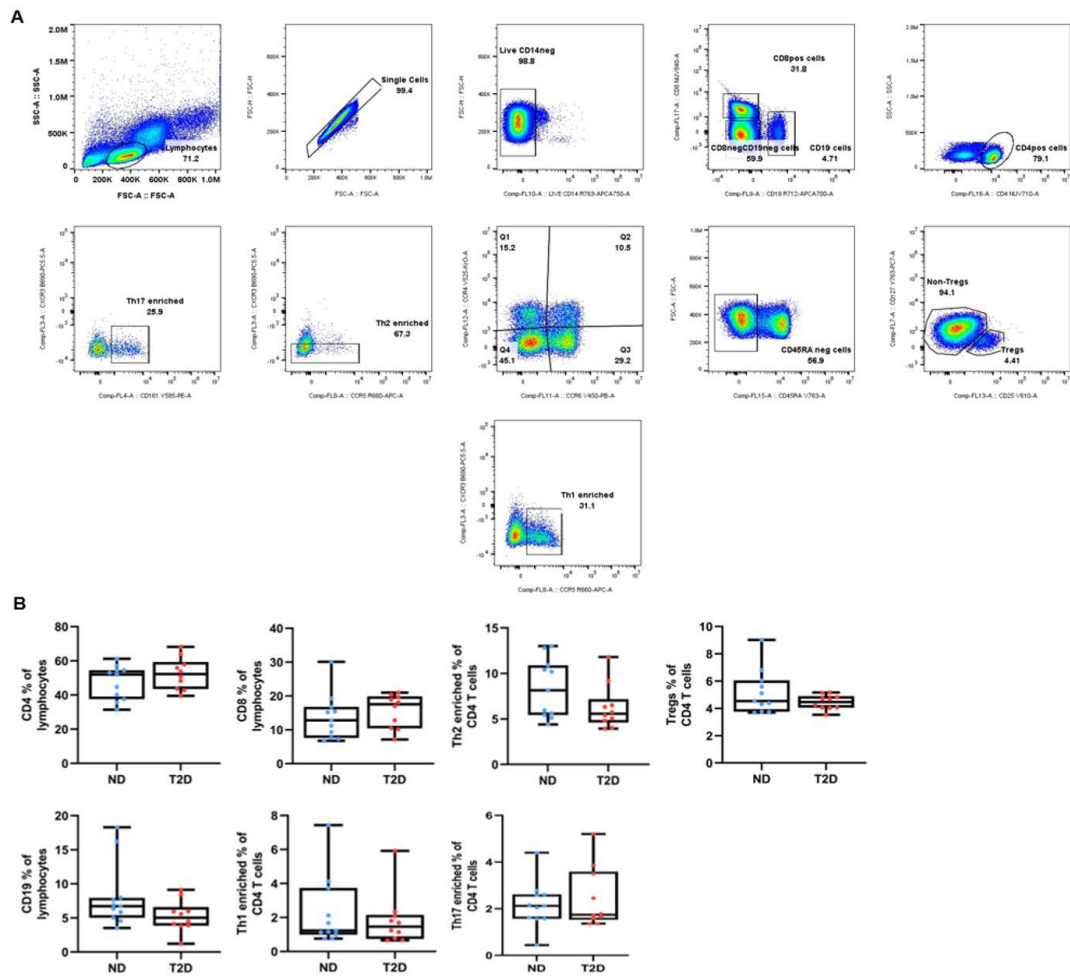

**Fig. S5: T cell and myeloid subset frequencies in PBMCs are similar between resting PBMCs from ND and diabetes subjects, and TNF- $\alpha$  production by myeloid cells is low in response to CD3/CD28 stimulation. A.** Flow cytometry gating strategy for quantification of immune cell subsets. **B.** Percentages of CD4+, CD8+, and CD19+ cells in resting PBMCs determined per gating in panel A. For all panels, samples are from ND (blue), prediabetes (purple), or diabetes (red) subjects. ND (n=11), T2D (n=10). Statistical difference was determined by **B.** Mann-Whitney U non-parametric t test

Table S1. Description of human donors

|                                                       | <b>Overweight/obesity<br/>+ non-diabetes</b> | <b>Obesity +<br/>prediabetes</b> | <b>Overweight/obesity<br/>+ type 2 diabetes</b> |
|-------------------------------------------------------|----------------------------------------------|----------------------------------|-------------------------------------------------|
| <b>Age, years<br/>[median (range)]</b>                | 56 (45-66)                                   | 56 (50-72)                       | 60 (47-64)                                      |
| <b>BMI, kg m<sup>2</sup><br/>[median (range)]</b>     | 34.03 (27-40)                                | 36.7 (31-38)                     | 34.5 (26-38)                                    |
| <b>A1c, % [median<br/>(range)]*</b>                   | 5.4 (5.1-5.6)                                | 5.4 (5.1-5.7)                    | 7 (5.6-10.3) <sup>†</sup>                       |
| <b>Fasting Blood<br/>Glucose<br/>[median (range)]</b> | 95 (88-107)                                  | 104.5 (98-110) <sup>‡</sup>      | Not measured for<br>T2D subjects                |
| <b>Total N</b>                                        | 9                                            | 10                               | 11                                              |
| <b>Females</b>                                        | 6                                            | 8                                | 6                                               |
| <b>Males</b>                                          | 3                                            | 2                                | 5                                               |
| <b>African<br/>American</b>                           | 1                                            | 1                                | 3                                               |
| <b>White/non-<br/>Hispanic</b>                        | 8                                            | 9                                | 8                                               |

\*Clinical diagnosis of type 2 diabetes sufficient for subjects on glycemic control drugs; non-diabetes or prediabetes was confirmed in some subjects based on 2hr oral glucose tolerance test blood glucose measures (not shown).

†Indicates a significant difference between non-diabetes and type 2 diabetes subjects based on ANOVA ( $P < 0.05$ )

‡Indicates a significant difference between non-diabetes and prediabetes subjects based on Student's t-test ( $P < 0.05$ )

Table S2. List of medications and smoker status

| <b>Medications</b>          | <b>Overweight/obesity<br/>+ non-diabetes</b> | <b>Obesity +<br/>prediabetes</b> | <b>Overweight/obesity +<br/>type 2 diabetes</b> |
|-----------------------------|----------------------------------------------|----------------------------------|-------------------------------------------------|
| <b>Metformin (N)</b>        | 0/9                                          | 0/10                             | 9/11                                            |
| <b>TZDs (N)</b>             | 0/9                                          | 0/10                             | 1/11                                            |
| <b>DPP-4 Inhibitors (N)</b> | 0/9                                          | 0/10                             | 3/11                                            |
| <b>Sulfonylurea (N)</b>     | 0/9                                          | 0/10                             | 2/11                                            |
| <b>Statins (N)</b>          | 3/9                                          | 4/10                             | 7/11                                            |
| <b>ACE Inhibitors (N)</b>   | 2/9                                          | 2/10                             | 3/11                                            |
| <b>Aspirin (N)</b>          | 2/9                                          | 0/10                             | 6/11                                            |
| <b>Smoker (N)</b>           | 1/9                                          | 1/10                             | 0/11                                            |

Table S3. MRMR prediction of non-diabetes, prediabetes, and type 2 diabetes donors.

| <b>Class</b>         | <b>Precision</b> | <b>Recall</b> | <b>F1</b> | <b>AUC</b> |
|----------------------|------------------|---------------|-----------|------------|
| <b>ND</b>            | 0.500            | 0.455         | 0.476     | 0.674      |
| <b>PreT2D</b>        | 0.500            | 0.545         | 0.522     | 0.682      |
| <b>T2D</b>           | 0.909            | 0.909         | 0.909     | 0.893      |
| <b>Micro Average</b> | 0.636            | 0.636         | 0.636     | 0.757      |
